# Supplementary material
Source: Springer Nature journal article supplement (https://www.springermedizin.de/resource/supplementary/13601_2013_1081_MOESM2_ESM.pdf/9678584)

**A**  
% of patients with non-missing data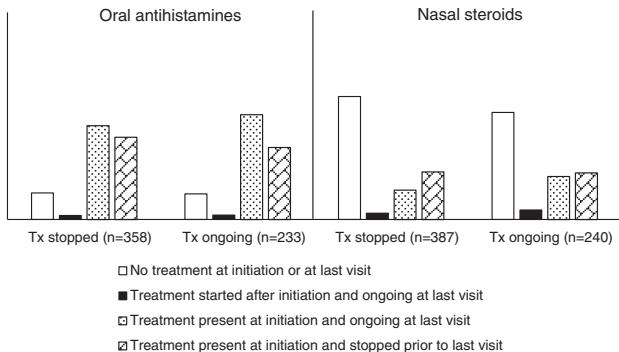**B**  
% of patients with non-missing data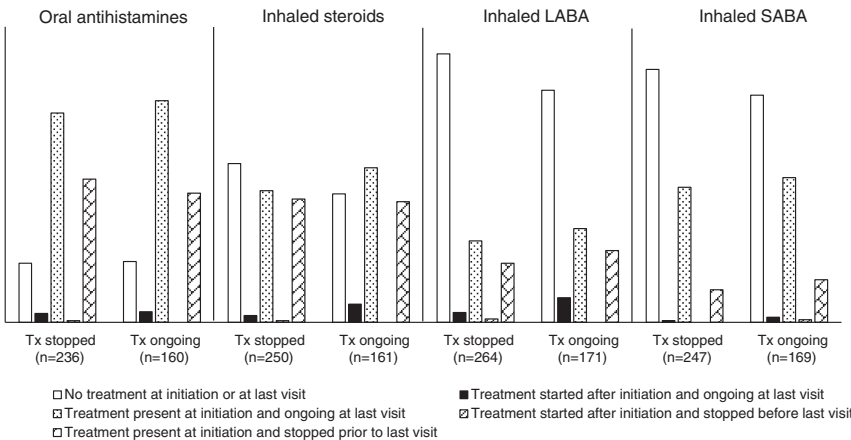

Supplement: MOESM2 [file 9678584]
